# Supplementary material for: Cucurbit[7]uril host–guest complexes of the histamine H2-receptor antagonist ranitidine
Source: Royal Society of Chemistry journal article supplement (doi:10.1039/b801591k), 2008-01-01
Supplement: b801591k.pdf [file b801591k.pdf]

## Electronic Supplementary Information

### Cucurbit[7]uril host-guest complexes of the histamine H<sub>2</sub>-receptor antagonist ranitidine

*Ruibing Wang and Donal H. Macartney\**

*Department of Chemistry, Queen's University, 90 Bader Lane, Kingston, ON K7L 3N6 Canada  
donal@chem.queensu.ca*

| <b>Contents</b>                                                                                                                                                                                                                      | <b>Page</b> |
|--------------------------------------------------------------------------------------------------------------------------------------------------------------------------------------------------------------------------------------|-------------|
| Figure S1 Electro spray mass spectra of {RH <sub>2</sub> •CB[7]} <sup>2+</sup> (top) and {RH•CB[7]} <sup>+</sup> (bottom) in aqueous solution                                                                                        | S3          |
| Figure S2 <sup>1</sup> H NMR spectra of (a) ranitidine at pD 1.5, (b) ranitidine at pD 1.5 with 0.7 equivalents of CB[7], and (c) ranitidine at pD 1.5 with 1.4 equivalents of CB[7], in D <sub>2</sub> O.                           | S4          |
| Figure S3 <sup>1</sup> H NMR spectra of (a) ranitidine at pD 4.8 and (b) ranitidine at pD 4.8 in the presence of 1.4 equivalents of CB[7] in D <sub>2</sub> O.                                                                       | S4          |
| Figure S4 <sup>1</sup> H NMR spectra of (a) ranitidine at pD 12 and (b) ranitidine at pD 12 in the presence of 0.5 equivalents of CB[7] and (c) ranitidine at pD 12 in the presence of 1.2 equivalents of CB[7] in D <sub>2</sub> O. | S5          |
| Figure S5 UV-visible Job's plot of ΔA against [RH <sup>+</sup> ]/([RH <sup>+</sup> ]+[CB[7]]) for ranitidine and cucurbit[7]uril (total concentration is 5.0 x 10 <sup>-5</sup> M), monitored at 312 nm.                             | S5          |
| Figure S6 <sup>1</sup> H NMR competition binding study of diprotonated ranitidine with cucurbit[7]uril in the presence of the competing TSP guest at pD = 1.5                                                                        | S6          |
| Figure S7 <sup>1</sup> H NMR competition binding study of monoprotonated ranitidine with cucurbit[7]uril in the presence of the competing TSP guest at pD = 4.7                                                                      | S6          |
| Figure S8 UV titration (monitored at 312 nm) of ranitidine (5 x 10 <sup>-5</sup> M) with CB[7] in aqueous solution (pH = 13.0) at 25 °C.                                                                                             | S7          |
| Figure S9. Structures of the diprotonated ranitidine (bottom) and the main thermal decomposition products (top).                                                                                                                     | S7          |
| Figure S10 <sup>1</sup> H NMR spectra of ranitidine (pD = 1.5) at 50 °C after (a) 0 days, (b) 2 days, (c) 4 days, (d) 6 days, (e) 10 days, and (f) 13 days.                                                                          | S8          |

|             |                                                                                                                                                                                              |     |
|-------------|----------------------------------------------------------------------------------------------------------------------------------------------------------------------------------------------|-----|
| Figure S11  | <sup>1</sup> H NMR spectra of ranitidine in the presence of 1.x equivalents of CB[7] at 50 °C (pD = 1.5) after (a) 0 days, (b) 2 days, (c) 4 days, (d) 6 days, (e) 10 days, and (f) 13 days. | S9  |
| Figure S12. | Figure S12. Dependence of absorbance at 226 nm (normalized) on irradiation (254 nm) time for ranitidine (●) and {RH <sub>2</sub> •CB[7]} <sup>2+</sup> at pH 1.5.                            | S10 |
| Figure S13  | Energy-minimized structure of {(E)-RH <sub>2</sub> •CB[7]} <sup>2+</sup> with atomic labeling                                                                                                | S11 |
| Table S1    | Cartesian coordinates of {(E)-RH <sub>2</sub> •CB[7]} <sup>2+</sup>                                                                                                                          | S11 |
| Figure S14  | Energy-minimized structure of {(E)-RH <sub>2</sub> •CB[7]} <sup>2+</sup> with atomic labeling                                                                                                | S15 |
| Table S2    | Cartesian coordinates of {(E)-RH•CB[7]} <sup>+</sup>                                                                                                                                         | S15 |

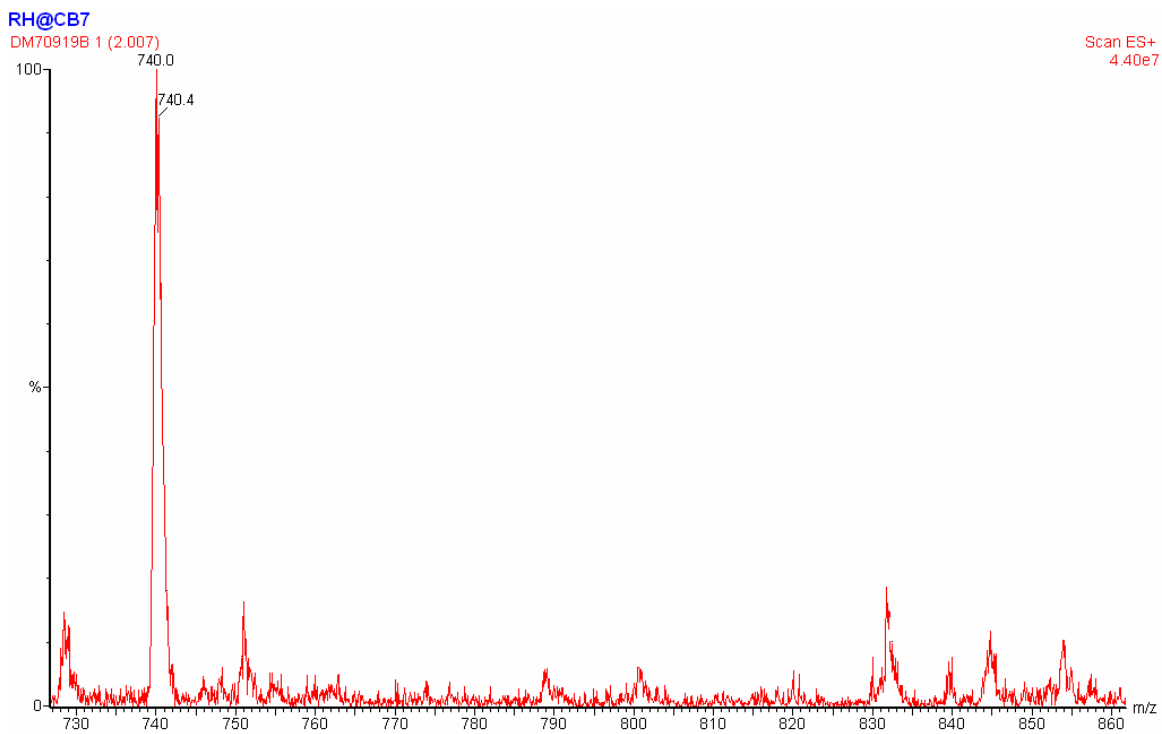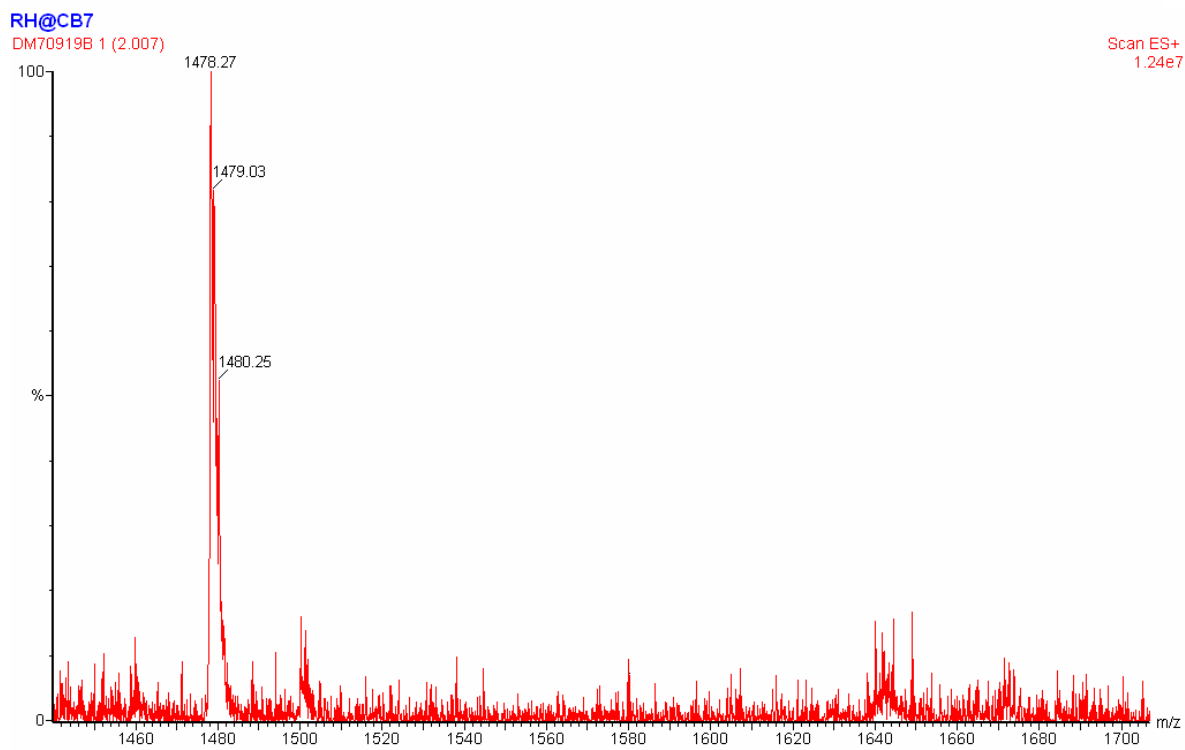

Figure S1 Electrospray mass spectra of  $\{RH_2 \cdot CB[7]\}^{2+}$  (top) and  $\{RH \cdot CB[7]\}^+$  (bottom) in aqueous solution.

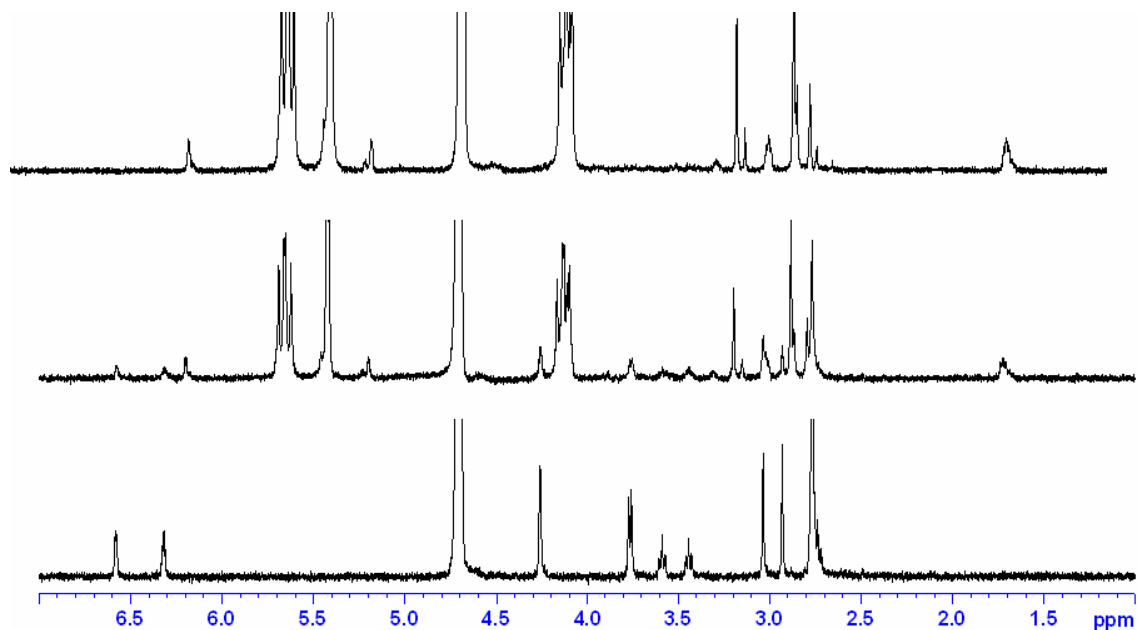

Figure S2  $^1\text{H}$  NMR spectra of (a) ranitidine at pD 1.5, (b) ranitidine at pD 1.5 with 0.7 equivalents of CB[7], and (c) ranitidine at pD 1.5 with 1.4 equivalents of CB[7], in  $\text{D}_2\text{O}$ .

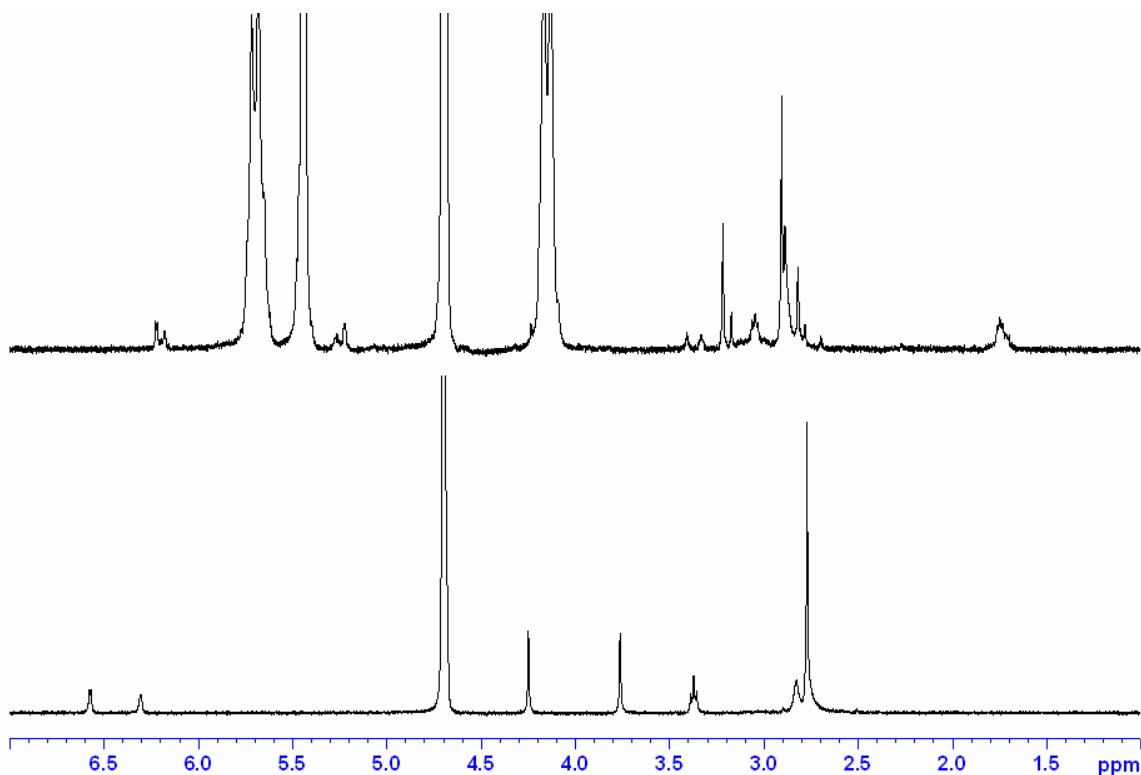

Figure S3  $^1\text{H}$  NMR spectra of (a) ranitidine at pD 4.8 and (b) ranitidine at pD 4.8 in the presence of 1.4 equivalents of CB[7] in  $\text{D}_2\text{O}$ .

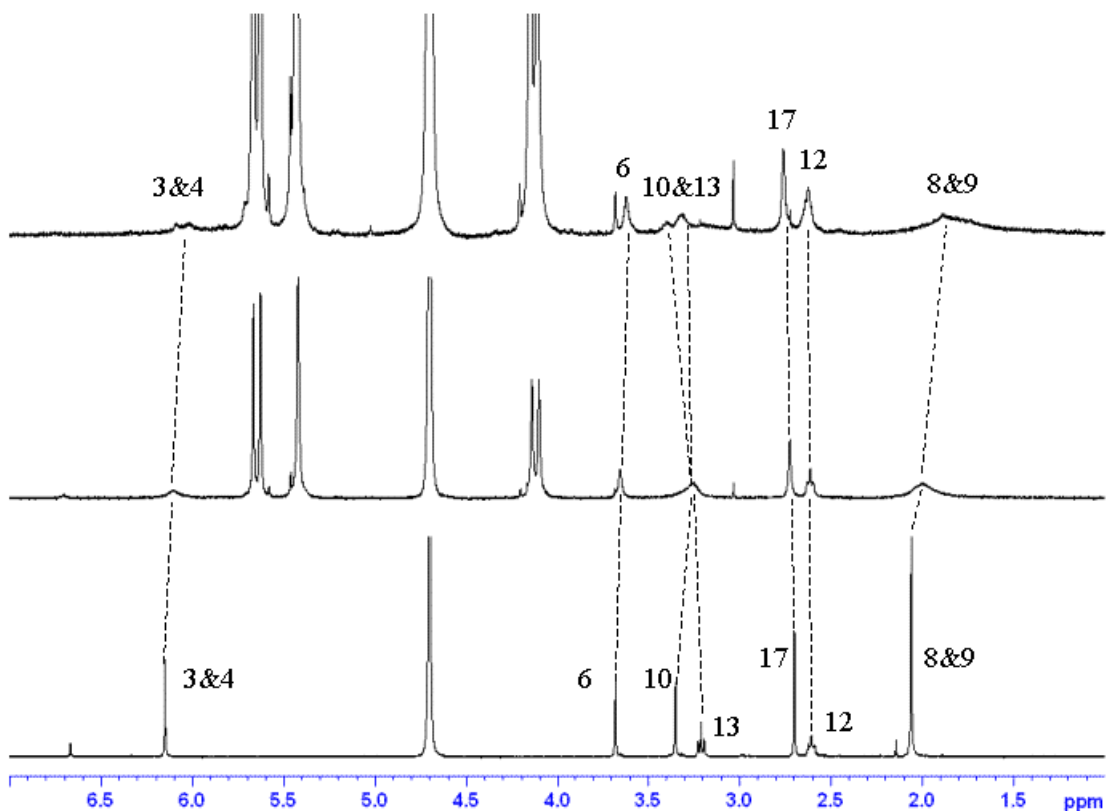

Figure S4  $^1\text{H}$  NMR spectra of (a) ranitidine at pD 12, (b) ranitidine at pD 12 with 0.5 equivalents of CB[7], and (c) ranitidine at pD 12 with 1.2 equivalents of CB[7], in  $\text{D}_2\text{O}$ .

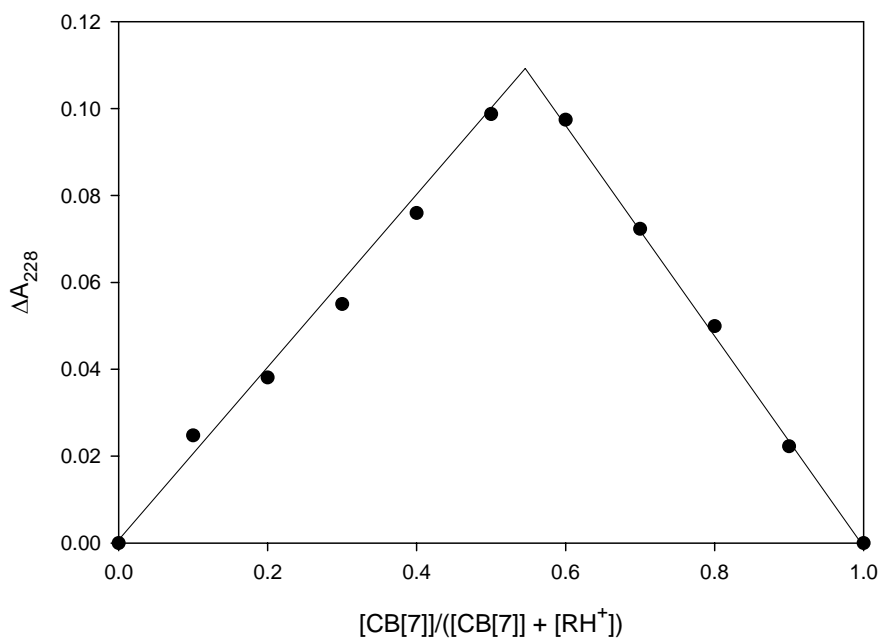

Figure S5 UV-visible Job's plot of  $\Delta A$  against  $[\text{RH}]/([\text{RH}]+[\text{CB}[7]])$  for ranitidine and cucurbit[7]uril (total concentration is  $5.0 \times 10^{-5}$  M), monitored at 228 nm.

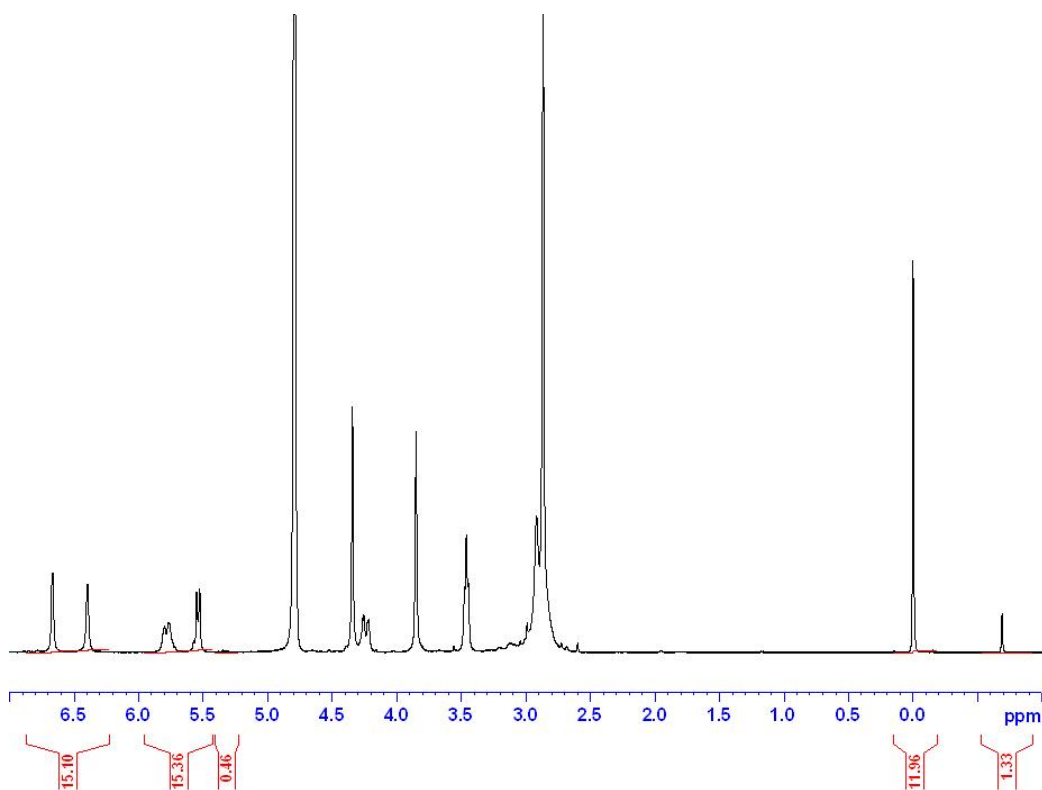

Figure S6 <sup>1</sup>H NMR competition binding study of diprotonated ranitidine with cucurbit[7]uril in the presence of the competing TSP guest

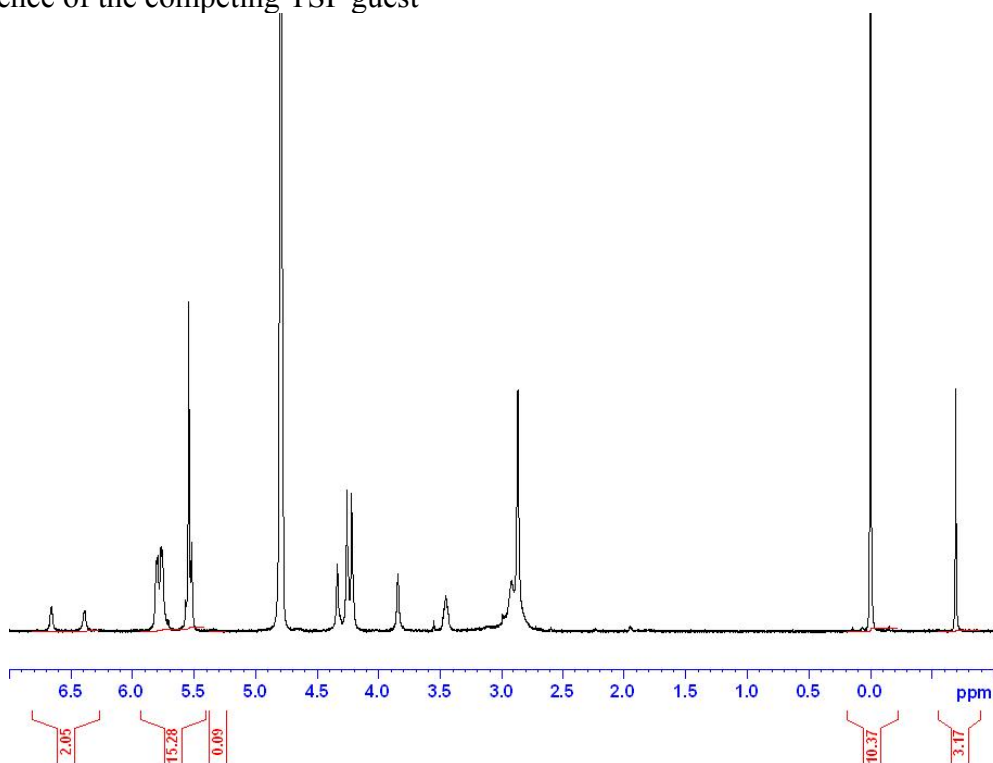

Figure S7 <sup>1</sup>H NMR competition binding study of monoprotated ranitidine with cucurbit[7]uril in the presence of the competing TSP guest

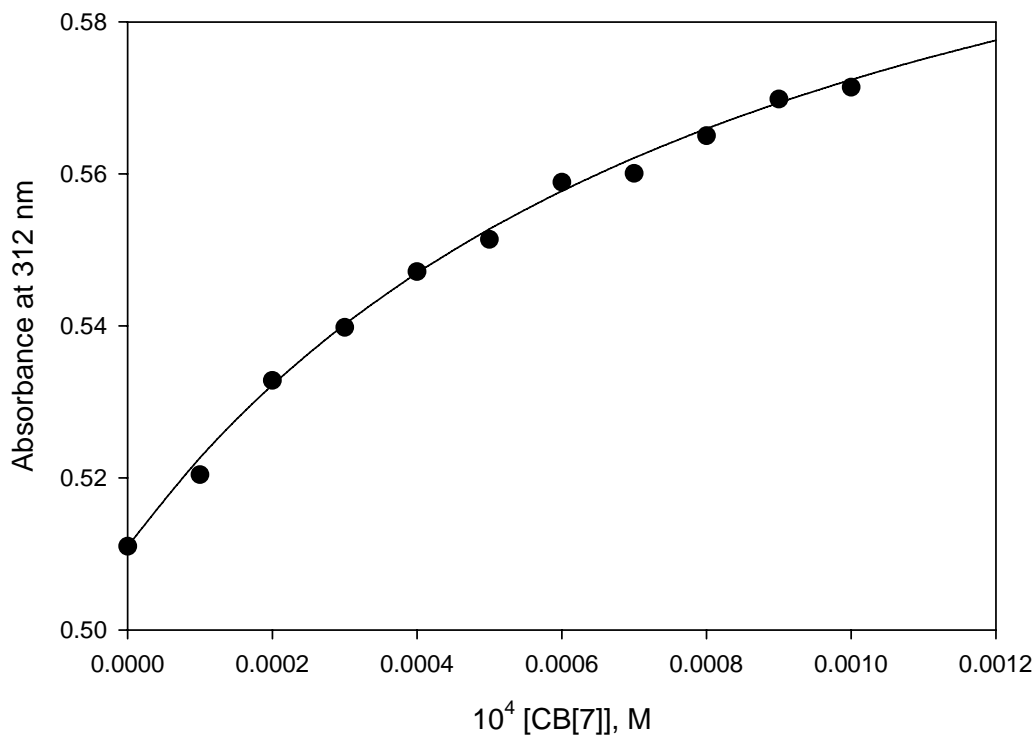

Figure S8 UV titration (monitored at 312 nm) of ranitidine ( $5 \times 10^{-5} \text{ M}$ ) with CB[7] in aqueous solution (pH = 13.0) at 25 °C. The solid curve corresponds to a non-linear least squares fit with a stability constant of  $K_{\text{CB}[7]}^3 = 1.2 \times 10^3 \text{ M}^{-1}$ .

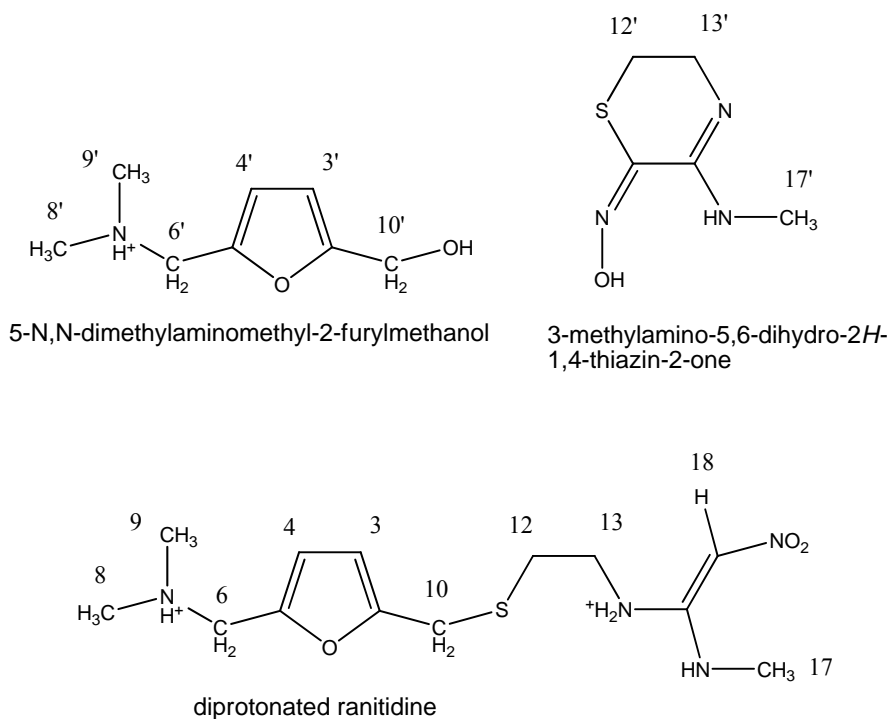

Figure S9. Structures of the diprotonated ranitidine (bottom) and the main thermal decomposition products (top).

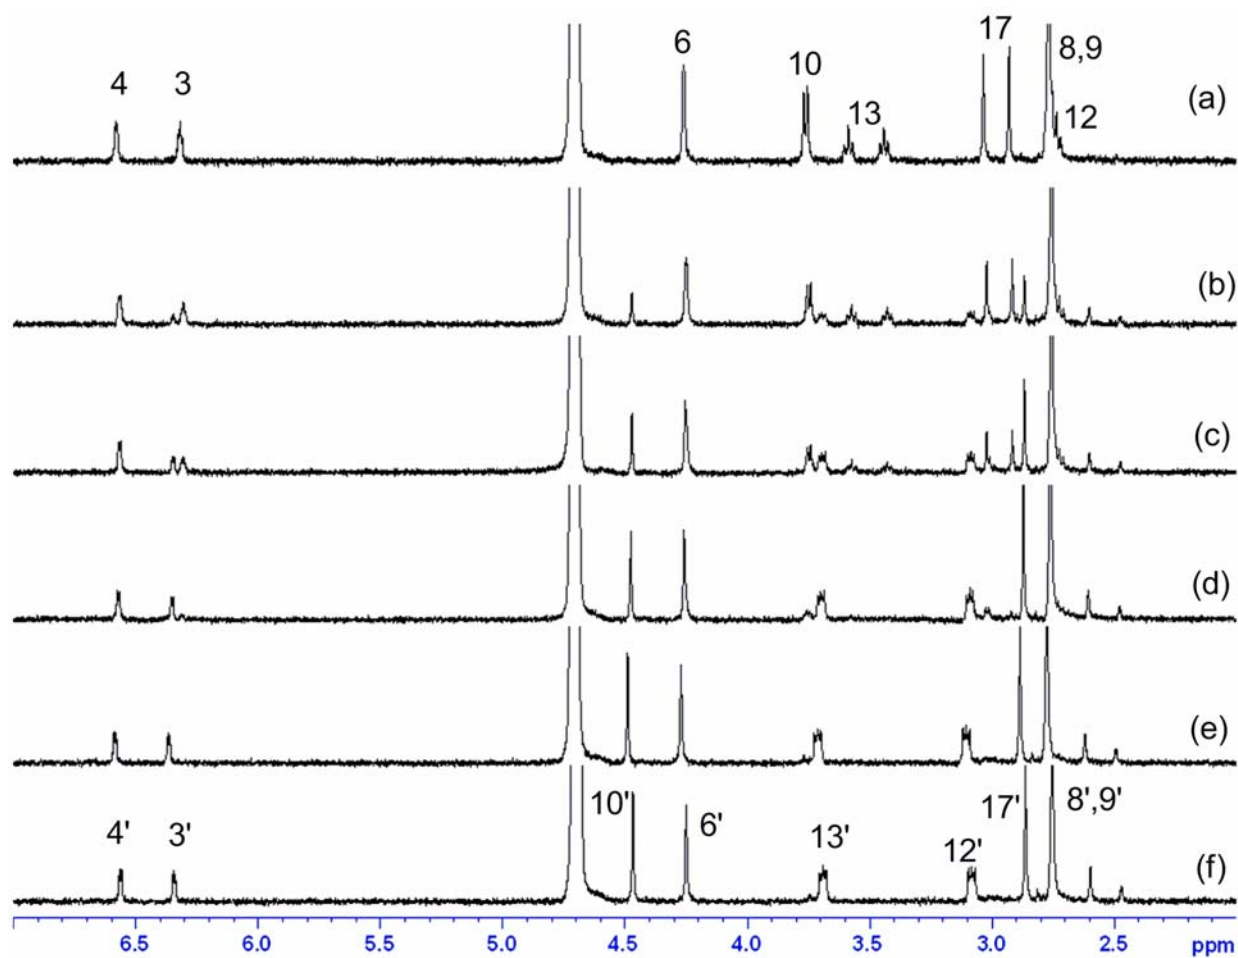

Figure S10 <sup>1</sup>H NMR spectra of ranitidine (pD 1.5) at 50 °C after (a) 0 days, (b) 2 days, (c) 4 days, (d) 6 days, (e) 10 days, and (f) 13 days.



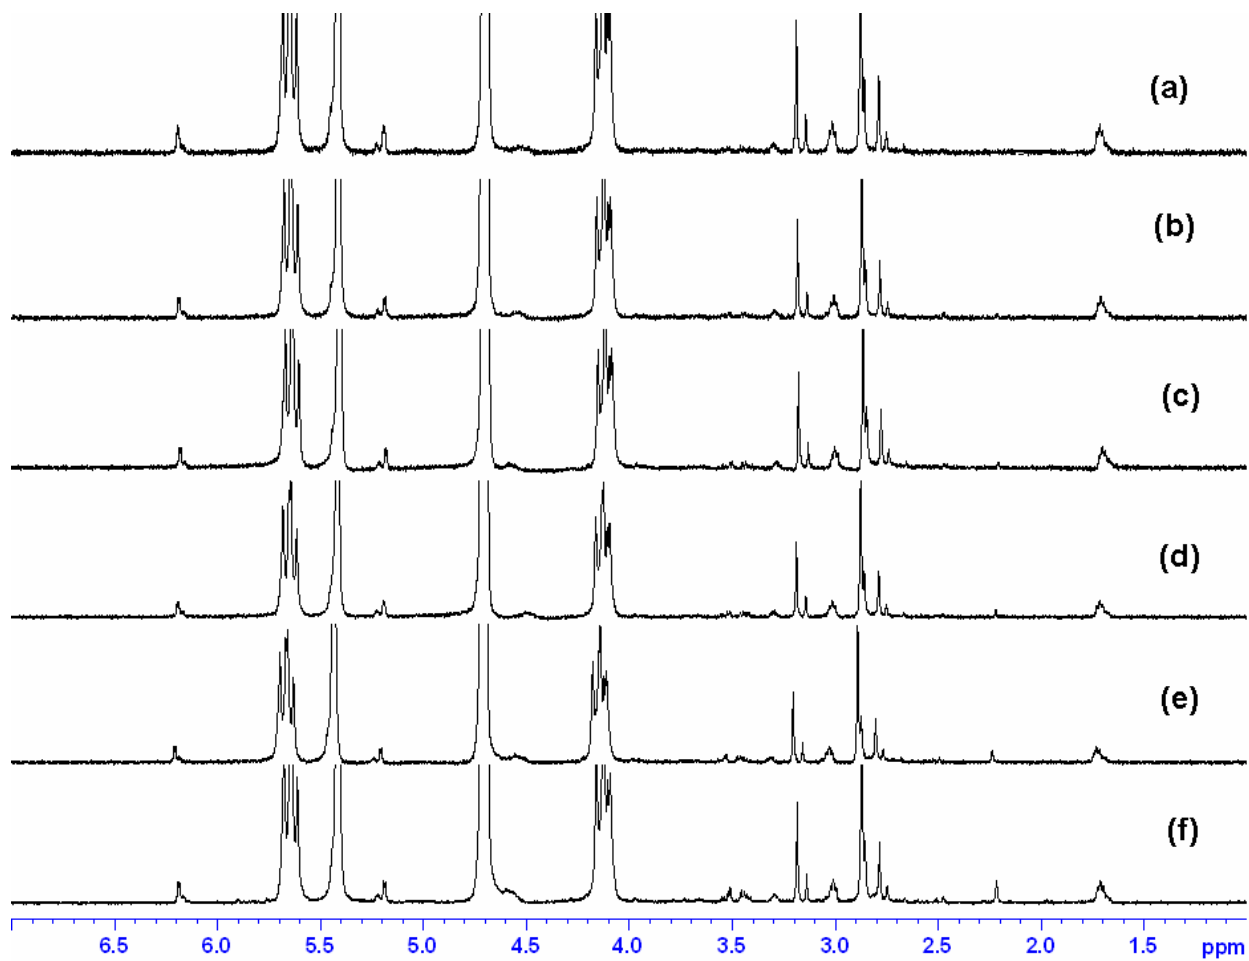

Figure S11 <sup>1</sup>H NMR spectra of the CB[7]-ranitidine host-guest complex at 50 °C in D<sub>2</sub>O (pD 1.5) after (a) 0 days, (b) 2 days, (c) 4 days, (d) 6 days, (e) 10 days, and (f) 13 days.

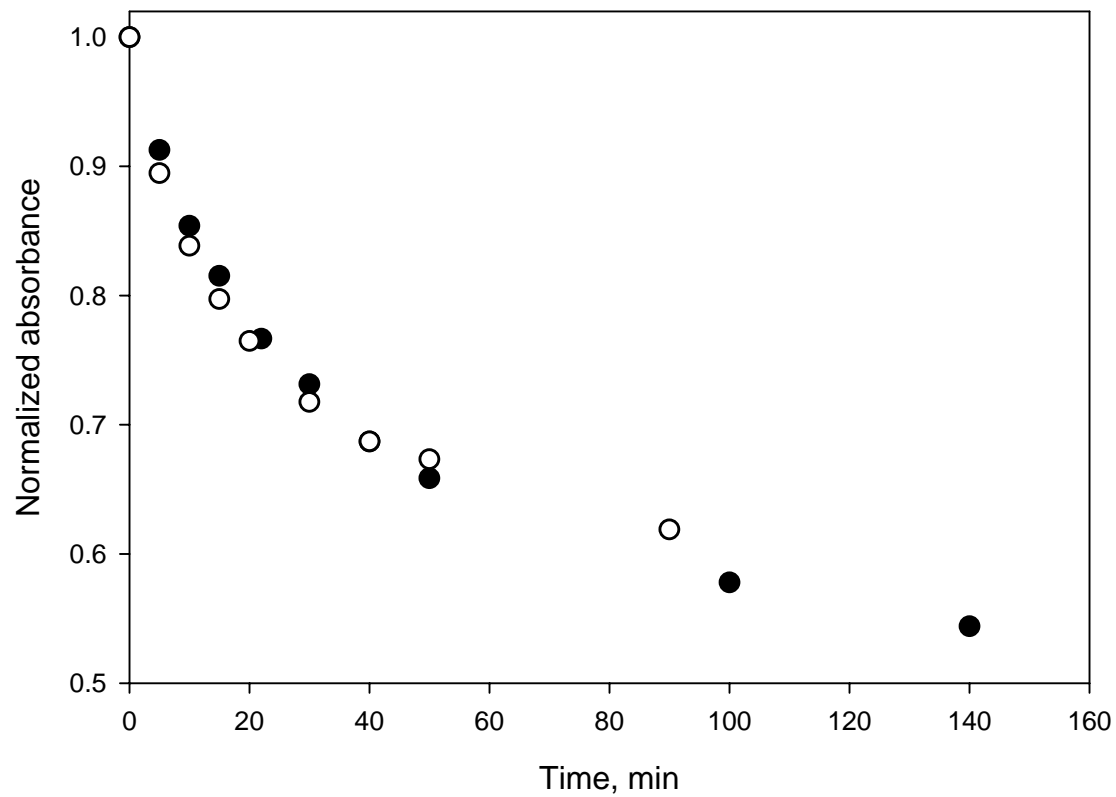

Figure S12. Dependence of absorbance at 226 nm (normalized) on irradiation (254 nm) time for ranitidine (●) and {RH<sub>2</sub>•CB[7]}<sup>2+</sup> at pH 1.5.

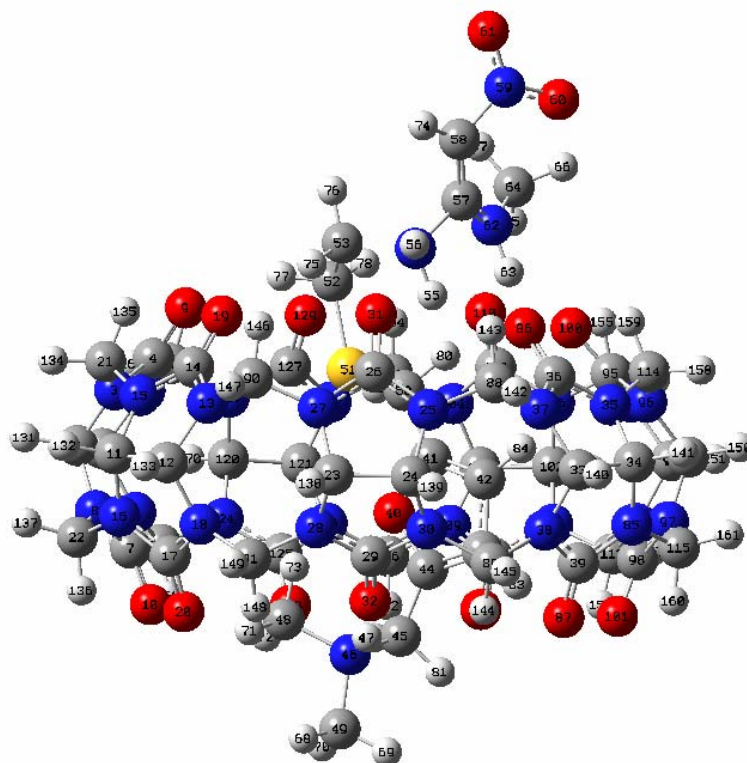

**Figure S13** Energy-minimized structure of  $\{(E)\text{-RH}_2\cdot\text{CB}[7]\}^{2+}$  with atomic labeling

**Table S1.** Cartesian coordinates of  $\{(E)\text{-RH}_2\cdot\text{CB}[7]\}^{2+}$

Standard orientation:

| Center Number | Atomic Number | Atomic Type | Coordinates (Angstroms) |           |           |
|---------------|---------------|-------------|-------------------------|-----------|-----------|
|               |               |             | X                       | Y         | Z         |
| 1             | 6             | C           | -5.713290               | 2.108645  | 1.123739  |
| 2             | 6             | C           | -6.202299               | 0.610023  | 0.976031  |
| 3             | 7             | N           | -5.298312               | -0.099252 | 1.856625  |
| 4             | 6             | C           | -4.433698               | 0.726716  | 2.531644  |
| 5             | 7             | N           | -4.699267               | 2.014637  | 2.145803  |
| 6             | 7             | N           | -5.241972               | 2.418189  | -0.212479 |
| 7             | 6             | C           | -5.448411               | 1.399079  | -1.105176 |
| 8             | 7             | N           | -6.037317               | 0.355702  | -0.436131 |
| 9             | 8             | O           | -3.648539               | 0.383028  | 3.390499  |
| 10            | 8             | O           | -5.222657               | 1.440883  | -2.297262 |
| 11            | 6             | C           | -5.484487               | -2.901376 | 0.043641  |
| 12            | 6             | C           | -4.472367               | -3.992024 | -0.493806 |
| 13            | 7             | N           | -3.502588               | -4.079796 | 0.569758  |
| 14            | 6             | C           | -3.662384               | -3.101867 | 1.520423  |
| 15            | 7             | N           | -4.811831               | -2.419484 | 1.234852  |
| 16            | 7             | N           | -5.572737               | -1.970587 | -1.057961 |
| 17            | 6             | C           | -4.692536               | -2.252864 | -2.065406 |
| 18            | 7             | N           | -4.000756               | -3.387624 | -1.725441 |

|    |    |   |           |           |           |
|----|----|---|-----------|-----------|-----------|
| 19 | 8  | O | -2.953852 | -2.943988 | 2.495644  |
| 20 | 8  | O | -4.587004 | -1.659485 | -3.121032 |
| 21 | 6  | C | -5.395211 | -1.499990 | 2.198413  |
| 22 | 6  | C | -6.477741 | -0.834095 | -1.138900 |
| 23 | 6  | C | -1.222304 | -5.198743 | -1.466449 |
| 24 | 6  | C | 0.328986  | -5.163390 | -1.730141 |
| 25 | 7  | N | 0.867636  | -4.976128 | -0.401371 |
| 26 | 6  | C | -0.092574 | -4.814871 | 0.559147  |
| 27 | 7  | N | -1.308230 | -4.993576 | -0.034070 |
| 28 | 7  | N | -1.713216 | -4.113254 | -2.281922 |
| 29 | 6  | C | -0.707700 | -3.392905 | -2.888592 |
| 30 | 7  | N | 0.484082  | -4.039078 | -2.628316 |
| 31 | 8  | O | 0.114079  | -4.633280 | 1.751033  |
| 32 | 8  | O | -0.856114 | -2.422364 | -3.607740 |
| 33 | 6  | C | 3.673841  | -3.888964 | -1.864135 |
| 34 | 6  | C | 4.800866  | -2.800746 | -1.673747 |
| 35 | 7  | N | 4.493041  | -2.283297 | -0.348462 |
| 36 | 6  | C | 3.472180  | -2.948442 | 0.267579  |
| 37 | 7  | N | 3.098706  | -3.984621 | -0.542059 |
| 38 | 7  | N | 2.822510  | -3.266095 | -2.859607 |
| 39 | 6  | C | 3.385525  | -2.141686 | -3.416456 |
| 40 | 8  | O | -0.118298 | 1.386132  | -1.194498 |
| 41 | 6  | C | 0.775572  | 0.811943  | -0.310179 |
| 42 | 6  | C | 1.781316  | 0.248648  | -0.998029 |
| 43 | 6  | C | 1.520880  | 0.479169  | -2.400000 |
| 44 | 6  | C | 0.378581  | 1.165307  | -2.470759 |
| 45 | 6  | C | -0.359102 | 1.662873  | -3.649034 |
| 46 | 7  | N | -1.410062 | 0.617655  | -4.060872 |
| 47 | 1  | H | -1.025803 | -0.309581 | -3.945645 |
| 48 | 6  | C | -2.619332 | 0.733697  | -3.137662 |
| 49 | 6  | C | -1.828846 | 0.787359  | -5.503872 |
| 50 | 6  | C | 0.451369  | 0.810412  | 1.140475  |
| 51 | 16 | S | -0.588894 | -0.670021 | 1.454689  |
| 52 | 6  | C | -0.651272 | -0.710499 | 3.279093  |
| 53 | 6  | C | -0.347203 | -2.132009 | 3.760140  |
| 54 | 7  | N | 1.086480  | -2.579252 | 3.342732  |
| 55 | 1  | H | 1.284497  | -2.257070 | 2.404737  |
| 56 | 1  | H | 1.083528  | -3.580175 | 3.235059  |
| 57 | 6  | C | 2.151715  | -2.092844 | 4.265997  |
| 58 | 6  | C | 2.285534  | -2.848869 | 5.361103  |
| 59 | 7  | N | 3.339767  | -2.743113 | 6.298561  |
| 60 | 8  | O | 4.375489  | -2.095987 | 6.001920  |
| 61 | 8  | O | 3.177158  | -3.382065 | 7.354671  |
| 62 | 7  | N | 2.678973  | -0.932521 | 3.886179  |
| 63 | 1  | H | 2.875113  | -0.779346 | 2.921754  |
| 64 | 6  | C | 3.229371  | 0.112174  | 4.789427  |
| 65 | 1  | H | 3.096799  | 1.049964  | 4.276638  |
| 66 | 1  | H | 4.262417  | -0.069999 | 5.021142  |
| 67 | 1  | H | 2.663739  | 0.113029  | 5.708620  |
| 68 | 1  | H | -2.582149 | 0.050138  | -5.726982 |
| 69 | 1  | H | -0.966133 | 0.653178  | -6.136195 |
| 70 | 1  | H | -2.233986 | 1.779056  | -5.621104 |
| 71 | 1  | H | -3.334246 | -0.022446 | -3.394363 |
| 72 | 1  | H | -3.027224 | 1.718733  | -3.247618 |
| 73 | 1  | H | -2.259976 | 0.609073  | -2.130189 |
| 74 | 1  | H | 1.604281  | -3.627478 | 5.606267  |
| 75 | 1  | H | -1.012365 | -2.833337 | 3.294757  |

|     |   |   |           |           |           |
|-----|---|---|-----------|-----------|-----------|
| 76  | 1 | H | -0.387133 | -2.204962 | 4.832849  |
| 77  | 1 | H | -1.651856 | -0.452531 | 3.583789  |
| 78  | 1 | H | 0.040341  | 0.012102  | 3.679023  |
| 79  | 1 | H | -0.095571 | 1.687937  | 1.430344  |
| 80  | 1 | H | 1.362852  | 0.761269  | 1.710917  |
| 81  | 1 | H | 0.323101  | 1.797264  | -4.469501 |
| 82  | 1 | H | -0.887888 | 2.571927  | -3.430311 |
| 83  | 1 | H | 2.112323  | 0.191307  | -3.233051 |
| 84  | 1 | H | 2.603716  | -0.278403 | -0.583768 |
| 85  | 7 | N | 4.564090  | -1.885788 | -2.761780 |
| 86  | 8 | O | 3.019795  | -2.708727 | 1.378122  |
| 87  | 8 | O | 2.938155  | -1.523553 | -4.359424 |
| 88  | 6 | C | 2.271378  | -5.075069 | -0.073443 |
| 89  | 6 | C | 1.654265  | -3.864878 | -3.479794 |
| 90  | 6 | C | -2.532000 | -5.137227 | 0.735182  |
| 91  | 6 | C | -3.107316 | -3.999376 | -2.686327 |
| 92  | 6 | C | 5.885171  | 0.676106  | -1.085474 |
| 93  | 6 | C | 5.545138  | 2.198975  | -0.818883 |
| 94  | 7 | N | 4.910202  | 2.159341  | 0.480157  |
| 95  | 6 | C | 4.600902  | 0.894966  | 0.879367  |
| 96  | 7 | N | 5.221953  | 0.020113  | 0.027994  |
| 97  | 7 | N | 5.297945  | 0.433180  | -2.379407 |
| 98  | 6 | C | 4.573922  | 1.507853  | -2.852191 |
| 99  | 7 | N | 4.672707  | 2.521317  | -1.931448 |
| 100 | 8 | O | 3.945916  | 0.576506  | 1.857954  |
| 101 | 8 | O | 4.008546  | 1.561681  | -3.920960 |
| 102 | 6 | C | 3.165100  | 4.885148  | -0.077720 |
| 103 | 6 | C | 1.722094  | 5.450232  | 0.230742  |
| 104 | 7 | N | 1.381575  | 4.800517  | 1.474970  |
| 105 | 6 | C | 2.333650  | 3.910816  | 1.904488  |
| 106 | 7 | N | 3.392557  | 3.992289  | 1.033585  |
| 107 | 7 | N | 3.001228  | 4.255136  | -1.370415 |
| 108 | 6 | C | 1.710944  | 4.330053  | -1.844582 |
| 109 | 7 | N | 0.962704  | 5.031493  | -0.927309 |
| 110 | 8 | O | 2.289127  | 3.238225  | 2.913068  |
| 111 | 8 | O | 1.319532  | 3.940876  | -2.925487 |
| 112 | 6 | C | 4.634590  | 3.317504  | 1.310779  |
| 113 | 6 | C | 4.103264  | 3.830467  | -2.218982 |
| 114 | 6 | C | 5.363161  | -1.373583 | 0.376163  |
| 115 | 6 | C | 5.434016  | -0.782808 | -3.160035 |
| 116 | 6 | C | -0.353479 | 5.538321  | -1.272859 |
| 117 | 6 | C | 0.267056  | 5.170150  | 2.322896  |
| 118 | 6 | C | -4.838642 | 3.733294  | -0.683159 |
| 119 | 6 | C | -4.092178 | 3.140648  | 2.825361  |
| 120 | 6 | C | -3.249217 | 4.771882  | 1.027842  |
| 121 | 6 | C | -1.809601 | 5.394532  | 0.831976  |
| 122 | 7 | N | -1.041035 | 4.750770  | 1.866351  |
| 123 | 7 | N | -3.041574 | 3.825106  | 2.098786  |
| 124 | 7 | N | -3.525379 | 4.188285  | -0.266875 |
| 125 | 6 | C | -2.464494 | 4.271995  | -1.135846 |
| 126 | 7 | N | -1.475922 | 5.000339  | -0.523393 |
| 127 | 6 | C | -1.735676 | 3.760526  | 2.520051  |
| 128 | 8 | O | -2.443996 | 3.860911  | -2.282468 |
| 129 | 8 | O | -1.289067 | 3.017769  | 3.366533  |
| 130 | 1 | H | -6.494186 | 2.791028  | 1.421252  |
| 131 | 1 | H | -7.227209 | 0.456676  | 1.275034  |
| 132 | 1 | H | -6.457883 | -3.295168 | 0.288641  |

|     |   |   |           |           |           |
|-----|---|---|-----------|-----------|-----------|
| 133 | 1 | H | -4.926422 | -4.952532 | -0.681113 |
| 134 | 1 | H | -6.437060 | -1.759410 | 2.331386  |
| 135 | 1 | H | -4.856967 | -1.633596 | 3.121465  |
| 136 | 1 | H | -6.553181 | -0.572354 | -2.180575 |
| 137 | 1 | H | -7.441893 | -1.132211 | -0.754421 |
| 138 | 1 | H | -1.692752 | -6.128411 | -1.745416 |
| 139 | 1 | H | 0.717889  | -6.065030 | -2.176951 |
| 140 | 1 | H | 4.038923  | -4.848205 | -2.194690 |
| 141 | 1 | H | 5.803299  | -3.195650 | -1.704615 |
| 142 | 1 | H | 2.665585  | -5.991053 | -0.490592 |
| 143 | 1 | H | 2.339303  | -5.108332 | 0.999431  |
| 144 | 1 | H | 1.377516  | -3.207592 | -4.286724 |
| 145 | 1 | H | 1.921783  | -4.837893 | -3.873354 |
| 146 | 1 | H | -2.244492 | -5.157121 | 1.771965  |
| 147 | 1 | H | -2.999569 | -6.073753 | 0.463590  |
| 148 | 1 | H | -3.145255 | -3.380969 | -3.566706 |
| 149 | 1 | H | -3.462021 | -4.995025 | -2.920841 |
| 150 | 1 | H | 6.940740  | 0.456824  | -1.085459 |
| 151 | 1 | H | 6.409789  | 2.842359  | -0.799518 |
| 152 | 1 | H | 3.929385  | 5.645617  | -0.120811 |
| 153 | 1 | H | 1.691799  | 6.523695  | 0.339345  |
| 154 | 1 | H | 5.454983  | 4.010964  | 1.191387  |
| 155 | 1 | H | 4.581485  | 2.981417  | 2.331804  |
| 156 | 1 | H | 3.726367  | 3.774976  | -3.226673 |
| 157 | 1 | H | 4.886310  | 4.574348  | -2.153056 |
| 158 | 1 | H | 6.387498  | -1.672926 | 0.200366  |
| 159 | 1 | H | 5.129897  | -1.472860 | 1.422064  |
| 160 | 1 | H | 5.167173  | -0.530383 | -4.172388 |
| 161 | 1 | H | 6.458132  | -1.121830 | -3.112071 |
| 162 | 1 | H | -0.519573 | 5.295528  | -2.308167 |
| 163 | 1 | H | -0.347568 | 6.613518  | -1.142936 |
| 164 | 1 | H | 0.434564  | 4.694903  | 3.275016  |
| 165 | 1 | H | 0.260353  | 6.246521  | 2.435546  |
| 166 | 1 | H | -4.836826 | 3.683714  | -1.758639 |
| 167 | 1 | H | -5.566926 | 4.459587  | -0.346946 |
| 168 | 1 | H | -3.644449 | 2.755328  | 3.726056  |
| 169 | 1 | H | -4.868363 | 3.854678  | 3.066411  |
| 170 | 1 | H | -4.006457 | 5.494256  | 1.289501  |
| 171 | 1 | H | -1.779809 | 6.468013  | 0.936020  |

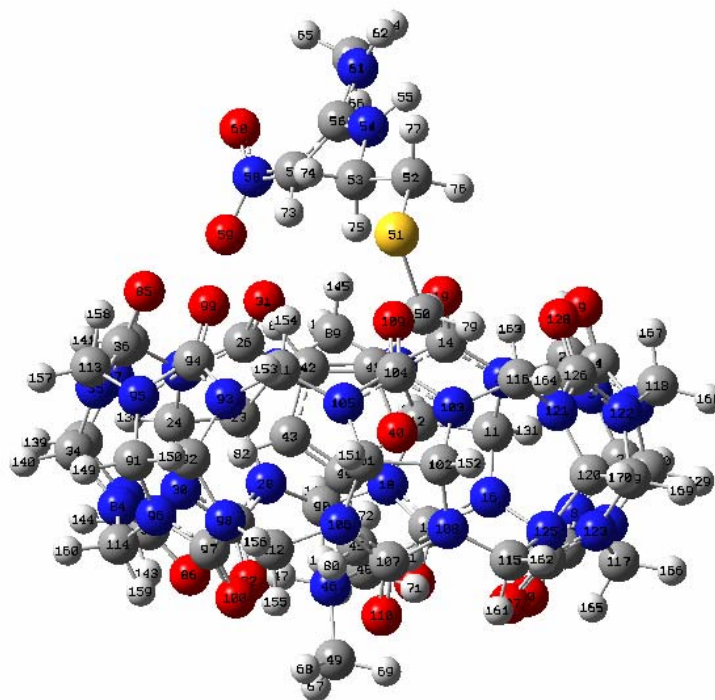

**Figure S14.** Energy-minimized structure of  $\{(E)\text{-RH}\cdot\text{CB}[7]\}^+$  with atomic labeling

**Table S2.** Cartesian coordinates for  $\{E\text{-RH}\cdot\text{CB}[7]\}^+$

Standard orientation:

| Center Number | Atomic Number | Atomic Type | Coordinates (Angstroms) |          |           |
|---------------|---------------|-------------|-------------------------|----------|-----------|
|               |               |             | X                       | Y        | Z         |
| 1             | 6             | C           | 0.366105                | 5.909080 | -0.736054 |
| 2             | 6             | C           | -1.138280               | 5.648959 | -1.150051 |
| 3             | 7             | N           | -1.682066               | 5.019539 | 0.030155  |
| 4             | 6             | C           | -0.780622               | 4.918877 | 1.065310  |
| 5             | 7             | N           | 0.399795                | 5.486525 | 0.641344  |
| 6             | 7             | N           | 1.093449                | 5.079320 | -1.673035 |
| 7             | 6             | C           | 0.283127                | 4.420278 | -2.562332 |
| 8             | 7             | N           | -1.009692               | 4.803945 | -2.314348 |
| 9             | 8             | O           | -1.015113               | 4.498261 | 2.175214  |
| 10            | 8             | O           | 0.657267                | 3.704478 | -3.470254 |
| 11            | 6             | C           | -4.019697               | 3.533588 | -1.853792 |
| 12            | 6             | C           | -4.747865               | 2.134680 | -1.977807 |
| 13            | 7             | N           | -4.475822               | 1.531420 | -0.693523 |
| 14            | 6             | C           | -3.773561               | 2.341220 | 0.156124  |

|    |    |   |           |           |           |
|----|----|---|-----------|-----------|-----------|
| 15 | 7  | N | -3.582395 | 3.546539  | -0.478761 |
| 16 | 7  | N | -2.969650 | 3.421344  | -2.843314 |
| 17 | 6  | C | -3.002309 | 2.241624  | -3.546521 |
| 18 | 7  | N | -4.086089 | 1.523339  | -3.108591 |
| 19 | 8  | O | -3.452083 | 2.084531  | 1.300172  |
| 20 | 8  | O | -2.253573 | 1.932645  | -4.449441 |
| 21 | 6  | C | -3.080825 | 4.701776  | 0.235299  |
| 22 | 6  | C | -2.078701 | 4.490258  | -3.240848 |
| 23 | 6  | C | -4.810599 | -1.503253 | -2.038761 |
| 24 | 6  | C | -4.176101 | -2.943875 | -1.961684 |
| 25 | 7  | N | -3.683369 | -3.006493 | -0.613077 |
| 26 | 6  | C | -3.725352 | -1.789421 | 0.025475  |
| 27 | 7  | N | -4.388929 | -0.907973 | -0.792374 |
| 28 | 7  | N | -4.188687 | -0.936175 | -3.216510 |
| 29 | 6  | C | -3.148593 | -1.693422 | -3.684930 |
| 30 | 7  | N | -3.146963 | -2.872579 | -2.983150 |
| 31 | 8  | O | -3.280862 | -1.561795 | 1.129073  |
| 32 | 8  | O | -2.403630 | -1.414821 | -4.604619 |
| 33 | 6  | C | -1.510815 | -5.306678 | -1.326700 |
| 34 | 6  | C | -0.041587 | -5.741458 | -0.931337 |
| 35 | 7  | N | 0.016822  | -5.447227 | 0.474631  |
| 36 | 6  | C | -1.104241 | -4.785787 | 0.936486  |
| 37 | 7  | N | -1.997873 | -4.715882 | -0.105609 |
| 38 | 7  | N | -1.287152 | -4.379126 | -2.419365 |
| 39 | 6  | C | 0.026165  | -4.049144 | -2.567697 |
| 40 | 8  | O | 0.955738  | 0.611563  | 0.120794  |
| 41 | 6  | C | 0.362096  | 0.101307  | 1.270441  |
| 42 | 6  | C | 0.438919  | -1.239712 | 1.247408  |
| 43 | 6  | C | 1.137197  | -1.599025 | 0.032968  |
| 44 | 6  | C | 1.434734  | -0.462269 | -0.615647 |
| 45 | 6  | C | 2.177411  | -0.192959 | -1.877790 |
| 46 | 7  | N | 1.325714  | -0.490846 | -3.118657 |
| 47 | 1  | H | 1.001540  | -1.448854 | -3.068963 |
| 48 | 6  | C | 0.112324  | 0.420344  | -3.226544 |
| 49 | 6  | C | 2.197014  | -0.402655 | -4.356454 |
| 50 | 6  | C | -0.188952 | 1.096749  | 2.246800  |
| 51 | 16 | S | -0.229156 | 0.397203  | 3.940653  |
| 52 | 6  | C | -1.882082 | 0.895681  | 4.505497  |
| 53 | 6  | C | -2.993816 | -0.015683 | 3.957856  |
| 54 | 7  | N | -4.278618 | 0.367597  | 4.597125  |
| 55 | 1  | H | -4.233750 | 1.070626  | 5.290347  |
| 56 | 6  | C | -5.506071 | -0.012297 | 4.179355  |
| 57 | 6  | C | -5.558798 | -0.782812 | 3.027797  |
| 58 | 7  | N | -6.617975 | -1.409276 | 2.449593  |
| 59 | 8  | O | -6.402280 | -1.870823 | 1.258265  |
| 60 | 8  | O | -7.737125 | -1.560115 | 3.019498  |
| 61 | 7  | N | -6.521044 | 0.468368  | 4.923309  |
| 62 | 1  | H | -6.268672 | 0.815823  | 5.813529  |
| 63 | 6  | C | -7.949380 | 0.613836  | 4.573697  |
| 64 | 1  | H | -8.323306 | 1.449940  | 5.146844  |
| 65 | 1  | H | -8.510588 | -0.274829 | 4.792572  |
| 66 | 1  | H | -8.056203 | 0.832006  | 3.526170  |
| 67 | 1  | H | 1.580483  | -0.607778 | -5.216028 |
| 68 | 1  | H | 2.981425  | -1.135330 | -4.258045 |
| 69 | 1  | H | 2.606867  | 0.593036  | -4.406573 |
| 70 | 1  | H | -0.548256 | 0.031334  | -3.981366 |
| 71 | 1  | H | 0.442866  | 1.415807  | -3.469514 |



|     |   |   |           |           |           |
|-----|---|---|-----------|-----------|-----------|
| 72  | 1 | H | -0.376056 | 0.421167  | -2.265550 |
| 73  | 1 | H | -4.659725 | -0.981986 | 2.509358  |
| 74  | 1 | H | -2.769779 | -1.049049 | 4.169403  |
| 75  | 1 | H | -3.061500 | 0.116597  | 2.894580  |
| 76  | 1 | H | -2.070654 | 1.923127  | 4.232399  |
| 77  | 1 | H | -1.839986 | 0.824921  | 5.584067  |
| 78  | 1 | H | -1.184768 | 1.401054  | 1.961277  |
| 79  | 1 | H | 0.442685  | 1.966577  | 2.272900  |
| 80  | 1 | H | 3.040197  | -0.829827 | -1.966511 |
| 81  | 1 | H | 2.480432  | 0.837032  | -1.949163 |
| 82  | 1 | H | 1.385135  | -2.585965 | -0.276699 |
| 83  | 1 | H | 0.089271  | -1.910868 | 1.994308  |
| 84  | 7 | N | 0.769708  | -4.882051 | -1.776542 |
| 85  | 8 | O | -1.290891 | -4.415833 | 2.071052  |
| 86  | 8 | O | 0.478965  | -3.212630 | -3.337696 |
| 87  | 6 | C | -3.347191 | -4.217029 | 0.102810  |
| 88  | 6 | C | -2.297634 | -3.965590 | -3.382126 |
| 89  | 6 | C | -5.029883 | 0.269255  | -0.242551 |
| 90  | 6 | C | -4.534705 | 0.335405  | -3.815234 |
| 91  | 6 | C | 3.334796  | -5.165454 | 0.294600  |
| 92  | 6 | C | 4.499081  | -4.260395 | 0.859310  |
| 93  | 7 | N | 3.829788  | -3.532930 | 1.918136  |
| 94  | 6 | C | 2.568801  | -4.015510 | 2.191881  |
| 95  | 7 | N | 2.300001  | -5.016494 | 1.279730  |
| 96  | 7 | N | 3.071262  | -4.539984 | -0.992033 |
| 97  | 6 | C | 3.973080  | -3.554179 | -1.309066 |
| 98  | 7 | N | 4.885305  | -3.482177 | -0.293765 |
| 99  | 8 | O | 1.859874  | -3.688831 | 3.112761  |
| 100 | 8 | O | 3.986450  | -2.915670 | -2.345432 |
| 101 | 6 | C | 6.014644  | -1.013224 | 1.567171  |
| 102 | 6 | C | 6.043819  | 0.569503  | 1.552704  |
| 103 | 7 | N | 4.888580  | 0.921467  | 2.339200  |
| 104 | 6 | C | 4.153965  | -0.173026 | 2.751535  |
| 105 | 7 | N | 4.813522  | -1.305013 | 2.313416  |
| 106 | 7 | N | 5.982160  | -1.340168 | 0.160836  |
| 107 | 6 | C | 5.881792  | -0.240689 | -0.655325 |
| 108 | 7 | N | 5.963401  | 0.872007  | 0.140640  |
| 109 | 8 | O | 3.178112  | -0.146801 | 3.460571  |
| 110 | 8 | O | 5.817756  | -0.254586 | -1.865726 |
| 111 | 6 | C | 4.468845  | -2.610803 | 2.842459  |
| 112 | 6 | C | 6.080291  | -2.667211 | -0.397328 |
| 113 | 6 | C | 1.092758  | -5.815504 | 1.375440  |
| 114 | 6 | C | 2.188556  | -5.069763 | -2.007972 |
| 115 | 6 | C | 6.099696  | 2.186651  | -0.445295 |
| 116 | 6 | C | 4.635943  | 2.236198  | 2.896201  |
| 117 | 6 | C | 2.526573  | 5.113712  | -1.870745 |
| 118 | 6 | C | 1.498055  | 5.710751  | 1.561394  |
| 119 | 6 | C | 3.671119  | 4.933639  | 0.421678  |
| 120 | 6 | C | 4.749324  | 3.888196  | 0.920059  |
| 121 | 7 | N | 4.053492  | 3.218237  | 1.998160  |
| 122 | 7 | N | 2.639667  | 4.829994  | 1.420213  |
| 123 | 7 | N | 3.327617  | 4.415140  | -0.887561 |
| 124 | 6 | C | 4.054866  | 3.306520  | -1.241709 |
| 125 | 7 | N | 4.982550  | 3.086826  | -0.255317 |
| 126 | 6 | C | 2.827305  | 3.770885  | 2.277480  |
| 127 | 8 | O | 3.951518  | 2.687140  | -2.282170 |
| 128 | 8 | O | 2.081885  | 3.444400  | 3.174038  |

|     |   |   |           |           |           |
|-----|---|---|-----------|-----------|-----------|
| 129 | 1 | H | 0.669543  | 6.940970  | -0.828273 |
| 130 | 1 | H | -1.683486 | 6.548101  | -1.393917 |
| 131 | 1 | H | -4.657107 | 4.379088  | -2.061843 |
| 132 | 1 | H | -5.809902 | 2.207762  | -2.152267 |
| 133 | 1 | H | -3.680579 | 5.558468  | -0.044229 |
| 134 | 1 | H | -3.188322 | 4.495238  | 1.286887  |
| 135 | 1 | H | -1.616391 | 4.172199  | -4.160342 |
| 136 | 1 | H | -2.659476 | 5.389329  | -3.402253 |
| 137 | 1 | H | -5.885021 | -1.504359 | -2.124671 |
| 138 | 1 | H | -4.871922 | -3.742879 | -2.162992 |
| 139 | 1 | H | -2.137887 | -6.122478 | -1.650287 |
| 140 | 1 | H | 0.177042  | -6.779540 | -1.127419 |
| 141 | 1 | H | -4.055844 | -4.984034 | -0.179513 |
| 142 | 1 | H | -3.427783 | -4.006174 | 1.155611  |
| 143 | 1 | H | -1.784650 | -3.639117 | -4.271067 |
| 144 | 1 | H | -2.906520 | -4.833316 | -3.600178 |
| 145 | 1 | H | -4.923735 | 0.246208  | 0.822541  |
| 146 | 1 | H | -6.080865 | 0.231921  | -0.488768 |
| 147 | 1 | H | -4.064464 | 0.356602  | -4.783865 |
| 148 | 1 | H | -5.609637 | 0.386337  | -3.915516 |
| 149 | 1 | H | 3.609184  | -6.201278 | 0.167191  |
| 150 | 1 | H | 5.340741  | -4.819161 | 1.238154  |
| 151 | 1 | H | 6.877209  | -1.457247 | 2.040758  |
| 152 | 1 | H | 6.941616  | 0.988763  | 1.981622  |
| 153 | 1 | H | 5.370948  | -3.071048 | 3.228399  |
| 154 | 1 | H | 3.760395  | -2.450819 | 3.639128  |
| 155 | 1 | H | 6.289762  | -2.539600 | -1.445864 |
| 156 | 1 | H | 6.888000  | -3.198417 | 0.086233  |
| 157 | 1 | H | 1.351891  | -6.851445 | 1.205388  |
| 158 | 1 | H | 0.710223  | -5.679270 | 2.373320  |
| 159 | 1 | H | 2.433516  | -4.557206 | -2.922746 |
| 160 | 1 | H | 2.372678  | -6.131755 | -2.114185 |
| 161 | 1 | H | 6.210331  | 2.030583  | -1.505289 |
| 162 | 1 | H | 6.983027  | 2.663580  | -0.041232 |
| 163 | 1 | H | 3.926631  | 2.107224  | 3.697641  |
| 164 | 1 | H | 5.570811  | 2.627420  | 3.279504  |
| 165 | 1 | H | 2.716803  | 4.639241  | -2.818914 |
| 166 | 1 | H | 2.844638  | 6.149074  | -1.897708 |
| 167 | 1 | H | 1.103873  | 5.547151  | 2.550473  |
| 168 | 1 | H | 1.838014  | 6.731788  | 1.452160  |
| 169 | 1 | H | 4.042170  | 5.944316  | 0.349496  |
| 170 | 1 | H | 5.667305  | 4.337671  | 1.265940  |
